# Supplementary material for: Midostaurin preferentially attenuates proliferation of triple-negative breast cancer cell lines through inhibition of Aurora kinase family
Source: PubMed Central journal article supplement (PMC4491224; doi:10.1186/s12929-015-0150-2), 2015-07-04
Supplement: 12929_2015_150_MOESM1_ESM.pdf [file 12929_2015_150_MOESM1_ESM.pdf]

## Additional file 1

| Cell line   | ATCC No. | Medium <sup>a</sup> | FBS | Addition                                      | CO <sub>2</sub> |
|-------------|----------|---------------------|-----|-----------------------------------------------|-----------------|
| AU565       | CRL-2351 | RPMI 1640           | 10% |                                               | 5%              |
| BT-20       | HTB-19   | MEM                 | 10% |                                               | 5%              |
| BT-474      | HTB-20   | DMEM                | 10% |                                               | 5%              |
| BT-549      | HTB-122  | RPMI 1640           | 10% | 1 µg/ml bovine insulin                        | 5%              |
| HCC1419     | CRL-2326 | RPMI 1640           | 10% |                                               | 5%              |
| HCC1428     | CRL-2327 | RPMI 1640           | 10% |                                               | 5%              |
| HCC1806     | CRL-2335 | RPMI 1640           | 10% |                                               | 5%              |
| HCC1954     | CRL-2338 | RPMI 1640           | 10% |                                               | 5%              |
| HS578T      | HTB-126  | DMEM                | 10% | 10 µg/ml bovine insulin                       | 5%              |
| MCF7        | HTB-22   | MEM <sup>b</sup>    | 10% | 10 µg/ml bovine insulin                       | 5%              |
| MDA-MB-157  | HTB-24   | Leibovitz's L-15    | 10% |                                               | 0%              |
| MDA-MB-231  | HTB-26   | Leibovitz's L-15    | 10% |                                               | 0%              |
| MDA-MB-435S | HTB-129  | Leibovitz's L-15    | 10% | 10 µg/ml bovine insulin                       | 0%              |
| MDA-MB-436  | HTB-130  | Leibovitz's L-15    | 10% | 10 µg/ml bovine insulin, 10 µg/ml glutathione | 0%              |
| MDA-MB-453  | HTB-131  | Leibovitz's L-15    | 10% |                                               | 0%              |
| MDA-MB-468  | HTB-132  | Leibovitz's L-15    | 10% |                                               | 0%              |
| SK-BR-3     | HTB-30   | McCoy's 5a          | 10% |                                               | 5%              |
| ZR-75-1     | CRL-1500 | RPMI 1640           | 10% |                                               | 5%              |
| ZR-75-30    | CRL-1504 | RPMI 1640           | 10% |                                               | 5%              |

a. Manufacturers of basal medium are Sigma-Aldrich (St. Louis, Missouri) except for MEM for MCF7.

b. MEM from Life Technologies (Carlsbad, California)
