# Supplementary material for: Midostaurin preferentially attenuates proliferation of triple-negative breast cancer cell lines through inhibition of Aurora kinase family
Source: PubMed Central journal article supplement (PMC4491224; doi:10.1186/s12929-015-0150-2), 2015-07-04

Additional file 4

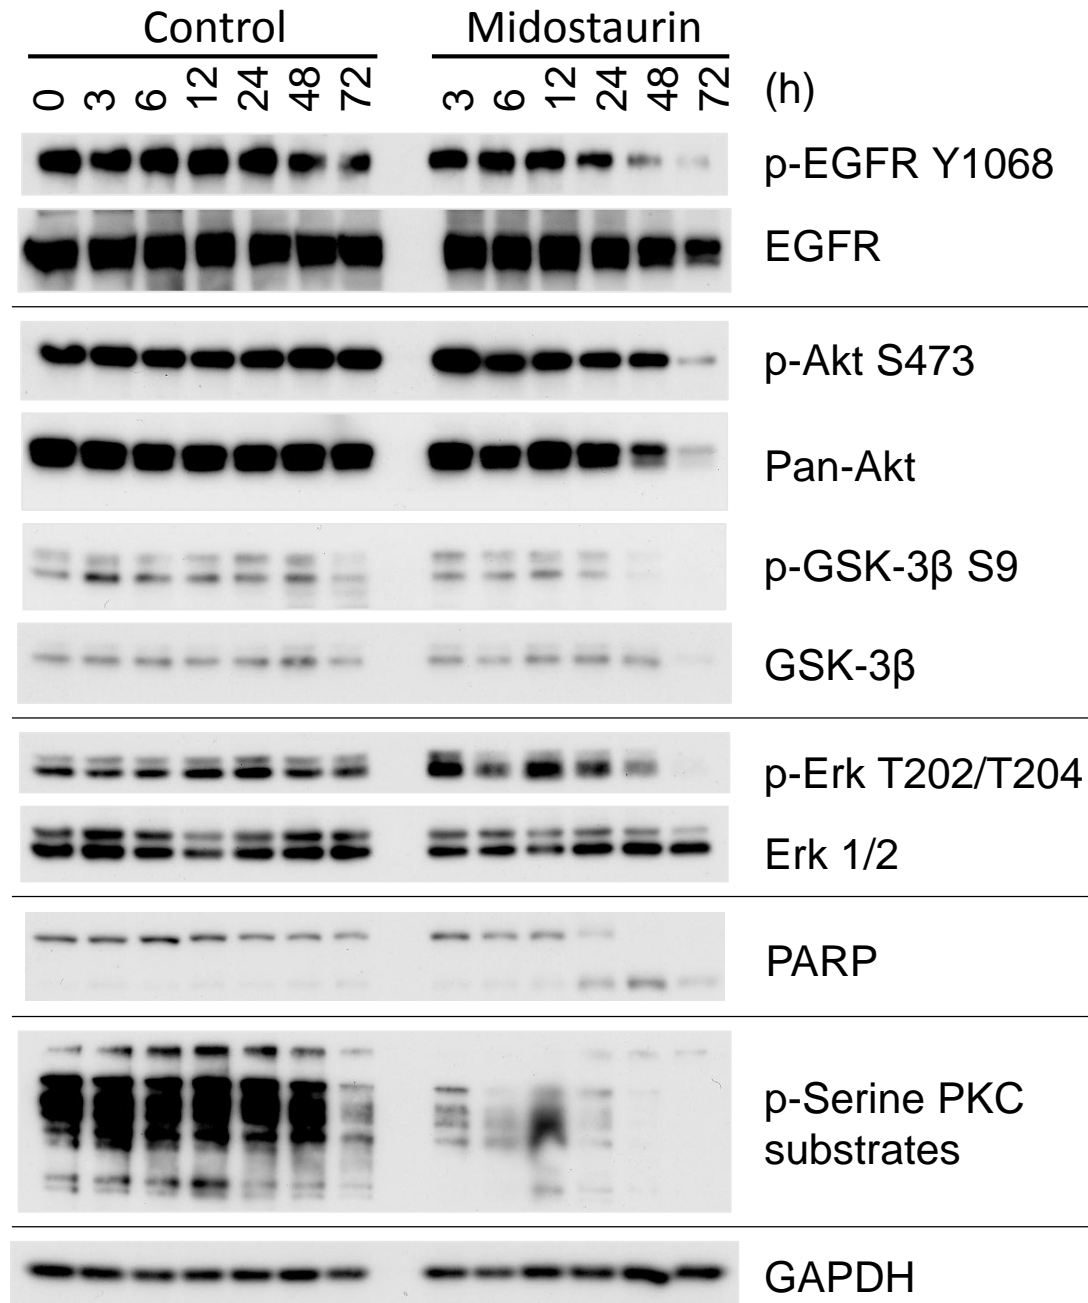

Supplement: 12929_2015_150_MOESM4_ESM.pdf [file 12929_2015_150_MOESM4_ESM.pdf]
